# Supplementary material for: Intercalative and non-intercalative photo-recharge using all-solid-state cells for solar energy conversion and storage
Source: Royal Society of Chemistry journal article supplement (doi:10.1039/d3se01636f), 2024-01-01
Supplement: d3se01636f1.pdf [file d3se01636f1.pdf]

## Supporting information

### **Intercalative and non-intercalative photo-recharge using all-solid-state cells for solar energy conversion and storage**

Masataka Yoshimoto,<sup>1</sup> Kazuhisa Tamura,<sup>2</sup> Kenta Watanabe,<sup>1\*</sup> Keisuke Shimizu,<sup>3</sup> Yuhei Horisawa,<sup>a</sup> Takeshi Kobayashi,<sup>d</sup> Hanae Tsurita,<sup>d</sup> Kota Suzuki,<sup>3</sup> Ryoji Kanno,<sup>3</sup> Masaaki Hirayama<sup>1,3\*</sup>

- a. Department of Chemical Science and Engineering, School of Materials and Chemical Technology, Tokyo Institute of Technology, 4259 Nagatsuta-cho, Midori-ku, Yokohama 226-8501, Japan
- b. Materials Sciences Research Center, Japan Atomic Energy Agency, 1-1-1, Koto, Sayo, Hyogo 679-5148, Japan
- c. Research Center for All-Solid-State Battery, Institute of Innovative Research, Tokyo Institute of Technology, 4259 Nagatsuta-cho, Midori-ku, Yokohama 226-8501, Japan
- d. Department of Electronic Chemistry, Interdisciplinary Graduate School of Science and Engineering, Tokyo Institute of Technology, 4259 Nagatsuta-cho, Midori-ku, Yokohama 226-8501, Japan.

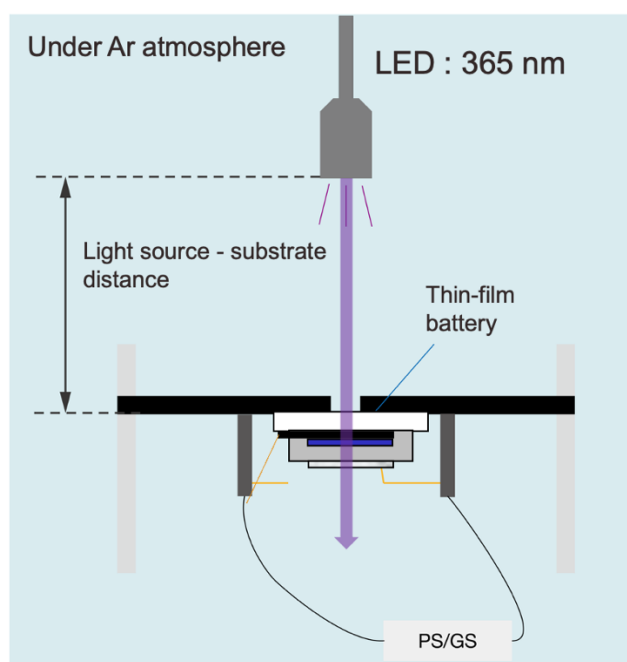

Fig. S1 Scheme of the measurement system for photoelectrochemical measurements.

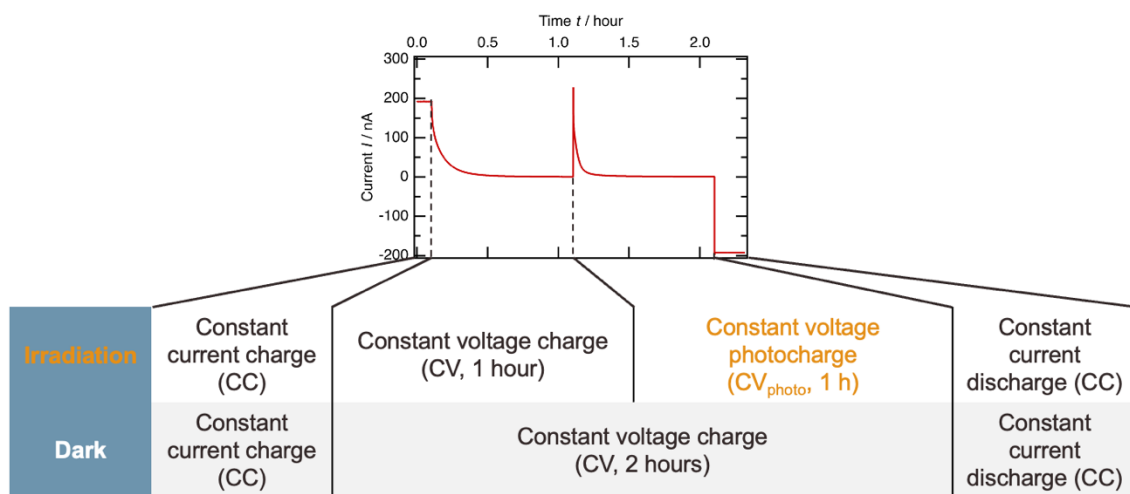

Figure S2 Time variation of current in the constant current-constant voltage-constant voltage under light irradiation (CC-CV-CV<sub>photo</sub>) / constant current (CC) discharge. The top row of the table shows the CC-CV-CV<sub>photo</sub> charge/CC discharge method. The bottom row of the table shows the CC-CV charge/CC discharge method.

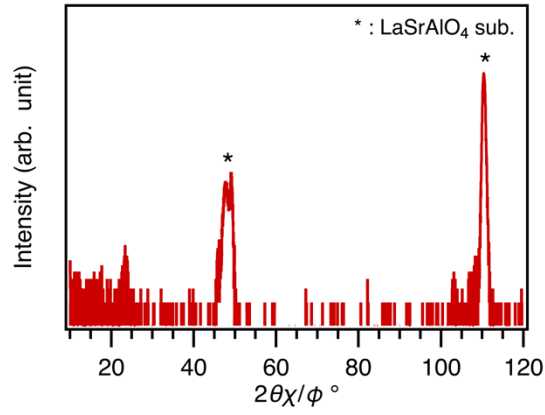

Fig. S3 A X-ray diffraction pattern at in-plane direction of an a-TiO<sub>2</sub>:Nb(001)/CaRuO<sub>3</sub>(100) films synthesized on LaSrAlO<sub>4</sub>(001) substrate.

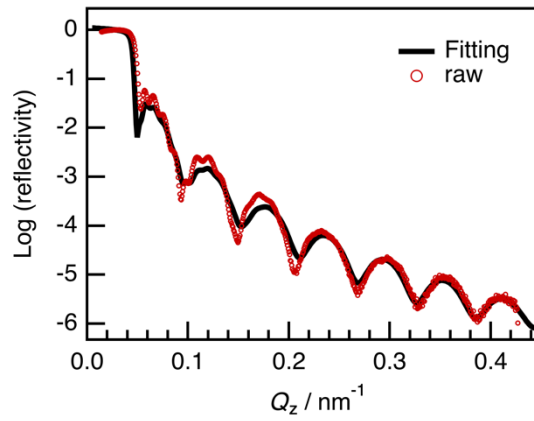

Fig. S4 A X-ray reflection spectra of an a-TiO<sub>2</sub>:Nb(001)/CaRuO<sub>3</sub>(100) films synthesised on LaSrAlO<sub>4</sub>(001) substrate.

Table S1 Refined thickness and roughness of a-TiO<sub>2</sub>:Nb and CaRuO<sub>3</sub> films.

| Layer                            | Thickness<br>l/nm | X-ray SLD<br>$\rho / 10^{-4} \text{ nm}^{-2}$ | Roughness<br>r/nm |
|----------------------------------|-------------------|-----------------------------------------------|-------------------|
| a-TiO <sub>2</sub> :Nb           | 10.7              | 29.845                                        | 0.3               |
| CaRuO <sub>3</sub>               | 40.0              | 41.194                                        | 0.1               |
| LaSrAlO <sub>4</sub> (substrate) | -                 | 43.938                                        | 0.8               |

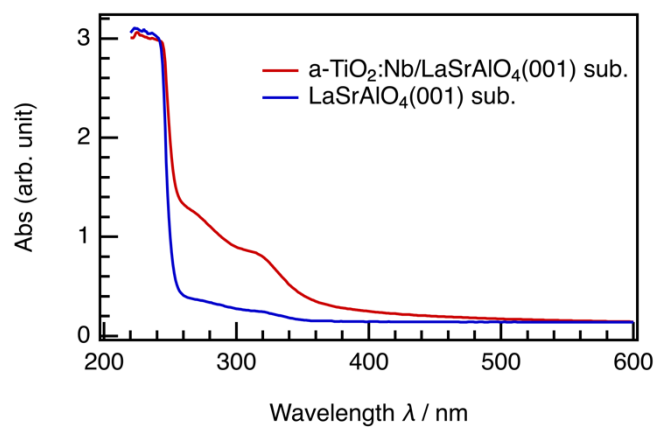

Fig. S5 Absorption spectrums of a-TiO<sub>2</sub>:Nb(001)/LaSrAlO<sub>4</sub>(001) substrate and LaSrAlO<sub>4</sub>(001) substrate.

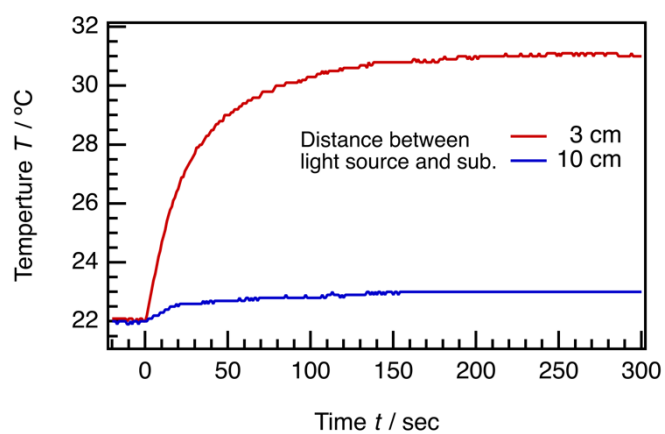

Fig. S6 Temperature change by light irradiation at different distances.
